# Supplementary material for: Identification and Molecular Characterization of Novel Mycoviruses in Saccharomyces and Non-Saccharomyces Yeasts of Oenological Interest
Source: MDPI journal article supplement (doi:10.3390/v14010052), 2021-12-29
Supplement: s1 [file s1]

**Supplementary Figure S2:** Alignment of the K2 preprotoxins from different M dsRNAs. Amino acid substitutions are highlighted.

|                    |   |                                                               |
|--------------------|---|---------------------------------------------------------------|
| ScV_M2_L2226       | 1 | -----SLVQDELTLGEPATQARMCVRLLRFFIGLTITAFIIAACIIKSATGGSGYSSNAV  |
| ScV_M2_EC1118      | 1 | -----SLVQDELTLGEPATRARMCVRLLRFFIGLTITAFIIAACIIKSATGGSGYSSNAV  |
| ScV_M2_2323        | 1 | -----SLVQDELTLGEPATQARMCVRLLRFFIGLTITAFIIAACIIKSATGGSGYSSNAV  |
| ScV_M2_QA23        | 1 | -----SLVQDELTLGEPATRARMCVRLLRFFIGLTITAFIIAACIIKSATGGSGYSSNAV  |
| ScV_M2_U43         | 1 | -----SLVQDELTLGEPATQARMCVRLLRFFIGLTITAFIIAACIIKSATGGSGYSSNAV  |
| ScV_M2_VL1         | 1 | -----SLVQDELTLGEPATRARMCVRLLRFFIGLTITAFIIAACIIKSATGGSGYSSNAV  |
| ScV_M2_X5          | 1 | -----SLVQDELTLGEPATRARMCVRLLRFFIGLTITAFIIAACIIKSATGGSGYSSNAV  |
| ScV_M2_FX10        | 1 | -----SLVQDELTLGEPATRARMCVRLLRFFIGLTITAFIIAACIIKSATGGSGYSSNAV  |
| ScV_M2_VR5         | 1 | -----SLVQDELTLGEPATRARMCVRLLRFFIGLTITAFIIAACIIKSATGGSGYSSNAV  |
| ScV_M2_PDM         | 1 | -----SLVQDELTLGEPATRARMCVRLLRFFIGLTITAFIIAACIIKSATGGSGYSSNAV  |
| ScV_M2_EZ44        | 1 | -----SLVQDELTLGEPATRARMCVRLLRFFIGLTITAFIIAACIIKSATGGSGYSSNAV  |
| Scv-M2 (X54154)    | 1 | -----SLVQDELTLGEPATRARMCVRLLRFFIGLTITAFIIAACIIKSATGGSGYSSNAV  |
| Scv-M2 (X56604)    | 1 | -----SLVQDELTLGEPATQARMCVRLLRFFIGLTITAFIIAACIIKSATGGSGYSSKAV  |
| Scv-M2-4           | 1 | -----SLVQDELTLGEPATQARMCVRLLRFFIGLTITAFIIAACIIKSATGGSGYSSNAV  |
| K2toxin (CAA38093) | 1 | MKETTTSLVQDELTLGEPATRARMCVRLLRFFIGLTITAFIIAACIIKSATGGSGYSSNAV |
| K2toxin (CAA39941) | 1 | MKETTTSLVQDELTLGEPATQARMCVRLLRFFIGLTITAFIIAACIIKSATGGSGYSSKAV |

|                    |    |                                                              |
|--------------------|----|--------------------------------------------------------------|
| ScV_M2_L2226       | 55 | AVRGEADTPSTIVGQLVERGGFQAWAVGAGIYLFAKIAYDTSKVTAAVCNPEALIAITSY |
| ScV_M2_EC1118      | 55 | AVRGEVDTPSTIVGQLVERGGFQAWAVGAGIYLFAKIAYDTSKVTAAVCNPEALIAITSY |
| ScV_M2_2323        | 55 | AVRGEADTPSTIVGQLVERGGFQAWAVGAGIYLFAKIAYDTSKVTAAVCNPEALIAITSY |
| ScV_M2_QA23        | 55 | AVRGEVDTPSTIVGQLVERGGFQAWAVGAGIYLFAKIAYDTSKVTAAVCNPEALIAITSY |
| ScV_M2_U43         | 55 | AVRGEADTPSTIVGQLVERGGFQAWAVGAGIYLFAKIAYDTSKVTAAVCNPEALIAITSY |
| ScV_M2_VL1         | 55 | AVRGEADTPSTIVGQLVERGGFQAWAVGAGIYLFAKIAYDTSKVTAAVCNPEALIAITSY |
| ScV_M2_X5          | 55 | AVRGEVDTPSTIVGQLVERGGFQAWAVGAGIYLFAKIAYDTSKVTAAVCNPEALIAITSY |
| ScV_M2_FX10        | 55 | AVRGEADTPSTIVGQLVERGGFQAWAVGAGIYLFAKIAYDTSKVTAAVCNPEALIAITSY |
| ScV_M2_VR5         | 55 | AVRGEVDTPSTIVGQLVERGGFQAWAVGAGIYLFAKIAYDTSKVTAAVCNPEALIAITSY |
| ScV_M2_PDM         | 55 | AVRGEVDTPSTIVGQLVERGGFQAWAVGAGIYLFAKIAYDTSKVTAAVCNPEALIAITSY |
| ScV_M2_EZ44        | 55 | AVRGEVDTPSTIVGQLVERGGFQAWAVGAGIYLFAKIAYDTSKVTAAVCNPEALIAITSY |
| Scv-M2 (X54154)    | 55 | AVRGEADTPSTIVGQLVERGGFQAWAVGAGIYLFAKIAYDTSKVTAAVCNPEALIAITSY |
| Scv-M2 (X56604)    | 55 | AVRGEADTPSTIVGQLVERGGFQAWAVGAGIYLFAKIAYDTSKVTAAVCNPEALIAITSY |
| Scv-M2-4           | 55 | AVRGEADTPSTIVGQLVERGGFQAWAVGAGIYLFAKIAYDTSKVTAAVCNPEALIAITSY |
| K2toxin (CAA38093) | 61 | AVRGEADTPSTIVGQLVERGGFQAWAVGAGIYLFAKIAYDTSKVTAAVCNPEALIAITSY |
| K2toxin (CAA39941) | 61 | AVRGEADTPSTIVGQLVERGGFQAWAVGAGIYLFAKIAYDTSKVTAAVCNPEALIAITSY |

|                    |     |                                                              |
|--------------------|-----|--------------------------------------------------------------|
| ScV_M2_L2226       | 115 | VAYAPTLGAGAYVIGAMSGAMSAGLALYAGYKGWQWGGPGGMAEREDVASFYSPLLNNTL |
| ScV_M2_EC1118      | 115 | VAYAPTLGAGAYVIGAMSGAMSAGLALYAGYKGWQWGGPGGMAEREDVASFYSPLLNNTL |
| ScV_M2_2323        | 115 | VAYAPTLGAGAYVIGAMSGAMSAGLALYAGYKGWQWGGPGGMAEREDVASFYSPLLNNTL |
| ScV_M2_QA23        | 115 | VAYAPTLGAGAYVIGAMSGAMSAGLALYAGYKGWQWGGPGGMAEREDVASFYSPLLNNTL |
| ScV_M2_U43         | 115 | VAYAPTLGAGAYVIGAMSGAMSAGLALYAGYKGWQWGGPGGMAEREDVASFYSPLLNNTL |
| ScV_M2_VL1         | 115 | VAYAPTLGAGAYVIGAMSGAMSAGLALYAGYKGWQWGGPGGMAEREDVASFYSPLLNNTL |
| ScV_M2_X5          | 115 | VAYAPTLGAGAYVIGAMSGAMSAGLALYAGYKGWQWGGPGGMAEREDVASFYSPLLNNTL |
| ScV_M2_FX10        | 115 | VAYAPTLGAGAYVIGAMSGAMSAGLALYAGYKGWQWGGPGGMAEREDVASFYSPLLNNTL |
| ScV_M2_VR5         | 115 | VAYAPTLGAGAYVIGAMSGAMSAGLALYAGYKGWQWGGPGGMAEREDVASFYSPLLNNTL |
| ScV_M2_PDM         | 115 | VAYAPTLGAGAYVIGAMSGAMSAGLALYAGYKGWQWGGPGGMAEREDVASFYSPLLNNTL |
| ScV_M2_EZ44        | 115 | VAYAPTLGAGAYVIGAMSGAMSAGLALYAGYKGWQWGGPGGMAEREDVASFYSPLLNNTL |
| Scv-M2 (X54154)    | 115 | VAYAPTLGAGAYVIGAMSGAMSAGLALYAGYKGWQWGGPGGMAEREDVASFYSPLLNNTL |
| Scv-M2 (X56604)    | 115 | VAYAPTLGAGAYVIGAMSGAMSAGLALYAGYKGWQWGGPGGMAEREDVASFYSPLLNNTL |
| Scv-M2-4           | 115 | VAYAPTLGAGAYVIGAMSGAMSAGLALYAGYKGWQWGGPGGMAEREDVASFYSPLLNNTL |
| K2toxin (CAA38093) | 121 | VAYAPTLGAGAYVIGAMSGAMSAGLALYAGYKGWQWGGPGGMAEREDVASFYSPLLNNTL |
| K2toxin (CAA39941) | 121 | VAYAPTLGAGAYVIGAMSGAMSAGLALYAGYKGWQWGGPGGMAEREDVASFYSPLLNNTL |

|                    |     |                                                              |
|--------------------|-----|--------------------------------------------------------------|
| ScV_M2_L2226       | 175 | YVGGDHTADYDSELATILGSVYNDVVHLGVYYDNSTGIVKRDSRPSMISWTVLHDNMMIT |
| ScV_M2_EC1118      | 175 | YVGGDHTADYDSELATILGSVYNDVVHLGVYYDNSTGIVKRDSRPSMISWTVLHDNMMIT |
| ScV_M2_2323        | 175 | YVGGDHTADYDSELATILGSVYNDVVHLGVYYDNSTGIVKRDSRPSMISWTVLHDNMMIT |
| ScV_M2_QA23        | 175 | YVGGDHTADYDSELATILGSVYNDVVHLGVYYDNSTGIVKRDSRPSMISWTVLHDNMMIT |
| ScV_M2_U43         | 175 | YVGGDHTADYDSELATILGSVYNDVVHLGVYYDNSTGIVKRDSRPSMISWTVLHDNMMIT |
| ScV_M2_VL1         | 175 | YVGGDHTADYDSELATILGSVYNDVVHLGVYYDNSTGIVKRDSRPSMISWTVLHDNMMIT |
| ScV_M2_X5          | 175 | YVGGDHTADYDSELATILGSVYNDVVHLGVYYDNSTGIVKRDSRPSMISWTVLHDNMMIT |
| ScV_M2_FX10        | 175 | YVGGDHTADYDSELATILGSVYNDVVHLGVYYDNSTGIVKRDSRPSMISWTVLHDNMMIT |
| ScV_M2_VR5         | 175 | YVGGDHTADYDSELATILGSVYNDVVHLGVYYDNSTGIVKRDSRPSMISWTVLHDNMMIT |
| ScV_M2_PDM         | 175 | YVGGDHTADYDSELATILGSVYNDVVHLGVYYDNSTGIVKRDSRPSMISWTVLHDNMMIT |
| ScV_M2_EZ44        | 175 | YVGGDHTADYDSELATILGSVYNDVVHLGVYYDNSTGIVKRDSRPSMISWTVLHDNMMIT |
| Scv-M2 (X54154)    | 175 | YVGGDHTADYDSELATILGSVYNDVVHLGVYYDNSTGIVKRDSRPSMISWTVLHDNMMIT |
| Scv-M2 (X56604)    | 175 | YVGGDHTADYDSELATILGSVYNDVVHLGVYYDNSTGIVKRDSRPSMISWTVLHDNMMIT |
| Scv-M2-4           | 175 | YVGGDHTADYDSELATILGSVYNDVVHLGVYYDNSTGIVKRDSRPSMISWTVLHDNMMIT |
| K2toxin (CAA38093) | 181 | YVGGDHTADYDSELATILGSVYNDVVHLGVYYDNSTGIVKRDSRPSMISWTVLHDNMMIT |

K2toxin (CAA39941) 181 YVGGDHTADYDSELATILGSVYNDVVHLGVYYDNSTGIVKRDSRPSMISWTVLHDNMMIT

|                        |     |                                                              |
|------------------------|-----|--------------------------------------------------------------|
| ScV_M2_L2226           | 235 | SYHRPDQLSAAATAYKAYATNTTRVGKRQDGEWVSYSVYGENVDYERYPVAHLQEEADAC |
| ScV_M2_EC1118          | 235 | SYHRPDQLGAAATAYKAYATNTTRVGKRQDGEWVSYSVYGENVDYERYPVAHLQEEADAC |
| ScV_M2_2323            | 235 | SYHRPDQLSAAATAYKAYATNTTRVGKRQDGEWVSYSVYGENVDYERYPVAHLQEEADAC |
| ScV_M2_QA23            | 235 | SYHRPDQLGAAATAYKAYATNTTRVGKRQDGEWVSYSVYGENVDYERYPVAHLQEEADAC |
| ScV_M2_U43             | 235 | SYHRPDQLSAAATAYKAYATNTTRVGKRQDGEWVSYSVYGENVDYERYPVAHLQEEADAC |
| ScV_M2_VL1             | 235 | SYHRPDQLGAAATAYKAYATNTTRVGKRQDGEWVSYSVYGENVDYERYPVAHLQEEADAC |
| ScV_M2_X5              | 235 | SYHRPDQLGAAATAYKAYATNTTRVGKRQDGEWVSYSVYGENVDYERYPVAHLQEEADAC |
| ScV_M2_FX10            | 235 | SYHRPDQLGAAATAYKAYATNTTRVGKRQDGEWVSYSVYGENVDYERYPVAHLQEEADAC |
| ScV_M2_VR5             | 235 | SYHRPDQLGAAATAYKAYATNTTRVGKRQDGEWVSYSVYGENVDYERYPVAHLQEEADAC |
| ScV_M2_PDM             | 235 | SYHRPDQLGAAATAYKAYATNTTRVGKRQDGEWVSYSVYGENVDYERYPVAHLQEEADAC |
| ScV_M2_EZ44            | 235 | SYHRPDQLGAAATAYKAYATNTTRVGKRQDGEWVSYSVYGENVDYERYPVAHLQEEADAC |
| Scv-M2 (X54154)        | 235 | SYHRPDQLGAAATAYKAYATNTTRVGKRQDGEWVSYSVYGENVDYERYPVAHLQEEADAC |
| Scv-M2 (X56604)        | 235 | SYHRPDQLGAAATAYKAYATNTTRVGKRQDGEWVSYSVYGENVDYERYPVAHLQEEADAC |
| Scv-M2-4               | 235 | SYHRPDQLGAAATAYKAYATNTTRVGKRQDGEWVSYSVYGENVDYERYPVAHLQEEADAC |
| K2toxin (CAA38093) 241 |     | SYHRPDQLGAAATAYKAYATNTTRVGKRQDGEWVSYSVYGENVDYERYPVAHLQEEADAC |
| K2toxin (CAA39941) 241 |     | SYHRPDQLGAAATAYKAYATNTTRVGKRQDGEWVSYSVYGENVDYERYPVAHLQEEADAC |

|                        |     |                                                              |
|------------------------|-----|--------------------------------------------------------------|
| ScV_M2_L2226           | 295 | YESLGNMITSQVQPCTQRECYAMDQKVCAAVGFSSDAGVNSAMVGEAYFYAYGGVDGECD |
| ScV_M2_EC1118          | 295 | YESLGNMITSQVQPCTQRECYAMDQKVCAAVGFSSDAGVNSAMVGEAYFYAYGGVDGECD |
| ScV_M2_2323            | 295 | YESLGNMITSQVQPCTQRECYAMDQKVCAAVGFSSDAGVNSAMVGEAYFYAYGGVDGECD |
| ScV_M2_QA23            | 295 | YESLGNMITSQVQPCTQRECYAMDQKVCAAVGFSSDAGVNSAMVGEAYFYAYGGVDGECD |
| ScV_M2_U43             | 295 | YESLGNMITSQVQPCTQRECYAMDQKVCAAVGFSSDAGVNSAMVGEAYFYAYGGVDGECD |
| ScV_M2_VL1             | 295 | YESLGNMITSQVQPCTQRECYAMDQKVCAAVGFSSDAGVNSAMVGEAYFYAYGGVDGECD |
| ScV_M2_X5              | 295 | YESLGNMITSQVQPCTQRECYAMDQKVCAAVGFSSDAGVNSAMVGEAYFYAYGGVDGECD |
| ScV_M2_FX10            | 295 | YESLGNMITSQVQPCTQRECYAMDQKVCAAVGFSSDAGVNSAMVGEAYFYAYGGVDGECD |
| ScV_M2_VR5             | 295 | YESLGNMITSQVQPCTQRECYAMDQKVCAAVGFSSDAGVNSAMVGEAYFYAYGGVDGECD |
| ScV_M2_PDM             | 295 | YESLGNMITSQVQPCTQRECYAMDQKVCAAVGFSSDAGVNSAMVGEAYFYAYGGVDGECD |
| ScV_M2_EZ44            | 295 | YESLGNMITSQVQPCTQRECYAMDQKVCAAVGFSSDAGVNSAMVGEAYFYAYGGVDGECD |
| Scv-M2 (X54154)        | 295 | YESLGNMITSQVQPCTQRECYAMDQKVCAAVGFSSDAGVNSAMVGEAYFYAYGGVDGECD |
| Scv-M2 (X56604)        | 295 | YESLGNMITSQVQPCTQRECYAMDQKVCAAVGFSSDAGVNSAMVGEAYFYAYGGVDGECD |
| Scv-M2-4               | 295 | YESLGNMITSQVQPCTQRECYAMDQKVCAAVGFSSDAGVNSAMVGEAYFYAYGGVDGECD |
| K2toxin (CAA38093) 301 |     | YESLGNMITSQVQPCTQRECYAMDQKVCAAVGFSSDAGVNSAMVGEAYFYAYGGVDGECD |
| K2toxin (CAA39941) 301 |     | YESLGNMITSQVQPCTQRECYAMDQKVCAAVGFSSDAGVNSAMVGEAYFYAYGGVDGECD |

|                        |     |    |
|------------------------|-----|----|
| ScV_M2_L2226           | 355 | S- |
| ScV_M2_EC1118          | 355 | S- |
| ScV_M2_2323            | 355 | S- |
| ScV_M2_QA23            | 355 | S- |
| ScV_M2_U43             | 355 | S- |
| ScV_M2_VL1             | 355 | S- |
| ScV_M2_X5              | 355 | S- |
| ScV_M2_FX10            | 355 | S- |
| ScV_M2_VR5             | 355 | S- |
| ScV_M2_PDM             | 355 | S- |
| ScV_M2_EZ44            | 355 | S- |
| Scv-M2 (X54154)        | 355 | S- |
| Scv-M2 (X56604)        | 355 | S- |
| Scv-M2-4               | 355 | S- |
| K2toxin (CAA38093) 361 |     | SG |
| K2toxin (CAA39941) 361 |     | SG |
