# Supplementary material for: Identification and Molecular Characterization of Novel Mycoviruses in Saccharomyces and Non-Saccharomyces Yeasts of Oenological Interest
Source: MDPI journal article supplement (doi:10.3390/v14010052), 2021-12-29
Supplement: s1 [file s1]

**Supplementary Table S7:** Amino acid percent identities of SbTV1 for RNA dependent RNA polymerase gene.

|                        | LRV1<br>(AHJ90430) | LRV1<br>(ASK05972) | GARV-L1<br>(NP_624332) | RaTV<br>(BBZ90082) | SbTV1<br>(OK412911) |
|------------------------|--------------------|--------------------|------------------------|--------------------|---------------------|
| LRV1<br>(AHJ90430)     | 100%               |                    |                        |                    |                     |
| LRV1<br>(ASK05972)     | 89,6%              | 100%               |                        |                    |                     |
| GARV-L1<br>(NP_624332) | 36,1%              | 36,3%              | 100%                   |                    |                     |
| RaTV<br>(BBZ90082)     | 38,9%              | 39,2%              | 40,5%                  | 100%               |                     |
| SbTV1<br>(OK412911)    | 41,8%              | 41,3%              | 42,3%                  | 43,9%              | 100%                |
