# Supplementary material for: Identification and Molecular Characterization of Novel Mycoviruses in Saccharomyces and Non-Saccharomyces Yeasts of Oenological Interest
Source: MDPI journal article supplement (doi:10.3390/v14010052), 2021-12-29
Supplement: s1 [file s1]

**Supplementary Table S5:** Nucleotide percent identity (below diagonal) and amino acid percent identity (above diagonal) of ScV-L-BC isolates.

|                                 | ScV-L-BC-La-D254<br>(OK377018) | ScV-L-BC2-EC1118<br>(OK377019) | ScV-L-BC-La-RC212<br>(OK377020) | ScV-L-BC2-QA23<br>(OK377021) | ScV-L-BC2-X5<br>(OK377022) | ScV-L-BC2-VR5<br>(OK377023) | ScV-L-BC2-PDM<br>(OK377024) | ScV-L-BC2-EZ44<br>(OK377025) | ScV-L-BC-lus<br>(KT784813) | ScV-L-BC2<br>(KX906605) | ScV-L-BC-La<br>(U01060) |
|---------------------------------|--------------------------------|--------------------------------|---------------------------------|------------------------------|----------------------------|-----------------------------|-----------------------------|------------------------------|----------------------------|-------------------------|-------------------------|
| ScV-L-BC-La-D254<br>(OK377018)  | 100%                           | 97,4%                          | 100,0%                          | 97,4%                        | 97,4%                      | 97,4%                       | 97,4%                       | 97,7%                        | 93,2%                      | 97,4%                   | 97,0%                   |
| ScV-L-BC2-EC1118<br>(OK377019)  | 95,5%                          | 100%                           | 97,4%                           | 100,0%                       | 99,6%                      | 99,6%                       | 99,6%                       | 99,2%                        | 94,0%                      | 100,0%                  | 97,0%                   |
| ScV-L-BC-La-RC212<br>(OK377020) | 100,0%                         | 95,5%                          | 100%                            | 97,4%                        | 97,4%                      | 97,4%                       | 97,4%                       | 97,7%                        | 93,2%                      | 97,4%                   | 97,0%                   |
| ScV-L-BC2-QA23<br>(OK377021)    | 95,5%                          | 100,0%                         | 95,5%                           | 100%                         | 99,6%                      | 99,6%                       | 99,6%                       | 99,2%                        | 94,0%                      | 100,0%                  | 97,0%                   |
| ScV-L-BC2-X5<br>(OK377022)      | 95,5%                          | 99,9%                          | 95,5%                           | 99,9%                        | 100%                       | 100,0%                      | 100,0%                      | 99,6%                        | 94,0%                      | 99,6%                   | 97,4%                   |
| ScV-L-BC2-VR5<br>(OK377023)     | 95,5%                          | 99,9%                          | 95,5%                           | 99,9%                        | 100,0%                     | 100%                        | 100,0%                      | 99,6%                        | 94,0%                      | 99,6%                   | 97,4%                   |
| ScV-L-BC2-PDM<br>(OK377024)     | 95,5%                          | 99,9%                          | 95,5%                           | 99,9%                        | 100,0%                     | 100,0%                      | 100%                        | 99,6%                        | 94,0%                      | 99,6%                   | 97,4%                   |
| ScV-L-BC2-EZ44<br>(OK377025)    | 95,6%                          | 99,8%                          | 95,6%                           | 99,8%                        | 99,9%                      | 99,9%                       | 99,9%                       | 100%                         | 93,6%                      | 99,2%                   | 97,7%                   |
| ScV-L-BC-lus<br>(KT784813)      | 90,0%                          | 90,0%                          | 90,0%                           | 90,0%                        | 90,0%                      | 90,0%                       | 90,0%                       | 89,9%                        | 100%                       | 94,0%                   | 94,0%                   |
| ScV-L-BC2<br>(KX906605)         | 95,5%                          | 100,0%                         | 95,5%                           | 100,0%                       | 99,9%                      | 99,9%                       | 99,9%                       | 99,8%                        | 90,0%                      | 100%                    | 97,0%                   |
| ScV-L-BC-La<br>(U01060)         | 96,1%                          | 94,5%                          | 96,1%                           | 94,5%                        | 94,6%                      | 94,6%                       | 94,6%                       | 94,8%                        | 89,3%                      | 94,5%                   | 100%                    |
