# Supplementary material for: Identification and Molecular Characterization of Novel Mycoviruses in Saccharomyces and Non-Saccharomyces Yeasts of Oenological Interest
Source: MDPI journal article supplement (doi:10.3390/v14010052), 2021-12-29
Supplement: s1 [file s1]

**Supplementary Table S8:** Amino acid percent identities of ScCV1 isolates for RNA dependent RNA polymerase.

|                          | CSpV1<br>(BAU19315) | CSpV1<br>(BAU19321) | CSpV1<br>(BAU19324) | CSpV1<br>(BAU19329) | CSpV1<br>(BAU19313) | CSpV1<br>(BAU19327) | CSpV1<br>(BAU19320) | CSpV1<br>(BAU19316) | CSpV1<br>(BAU19333) | CSpV1<br>(BAU19330) | CSpV1<br>(BAU19332) | CSpV1<br>(BAU19314) | CSpV1<br>(QBA97381) | CSpV1<br>(BAU19331) | CSpV1<br>(BAU19319) | CSpV1<br>(BAU19335) | CSpV1<br>(BAU19317) | CSpV1<br>(ABV83023) | CSpV1<br>(AAC47806) | ScCV1-D254<br>(OK412915) | ScCV1-U43<br>(OK412916) |
|--------------------------|---------------------|---------------------|---------------------|---------------------|---------------------|---------------------|---------------------|---------------------|---------------------|---------------------|---------------------|---------------------|---------------------|---------------------|---------------------|---------------------|---------------------|---------------------|---------------------|--------------------------|-------------------------|
| CSpV1<br>(BAU19315)      | 100%                |                     |                     |                     |                     |                     |                     |                     |                     |                     |                     |                     |                     |                     |                     |                     |                     |                     |                     |                          |                         |
| CSpV1<br>(BAU19321)      | 98,9%               | 100%                |                     |                     |                     |                     |                     |                     |                     |                     |                     |                     |                     |                     |                     |                     |                     |                     |                     |                          |                         |
| CSpV1<br>(BAU19324)      | 98,5%               | 97,7%               | 100%                |                     |                     |                     |                     |                     |                     |                     |                     |                     |                     |                     |                     |                     |                     |                     |                     |                          |                         |
| CSpV1<br>(BAU19329)      | 98,7%               | 97,9%               | 99,4%               | 100%                |                     |                     |                     |                     |                     |                     |                     |                     |                     |                     |                     |                     |                     |                     |                     |                          |                         |
| CSpV1<br>(BAU19313)      | 99,8%               | 99,0%               | 98,7%               | 98,9%               | 100%                |                     |                     |                     |                     |                     |                     |                     |                     |                     |                     |                     |                     |                     |                     |                          |                         |
| CSpV1<br>(BAU19327)      | 99,0%               | 98,7%               | 98,3%               | 98,5%               | 99,2%               | 100%                |                     |                     |                     |                     |                     |                     |                     |                     |                     |                     |                     |                     |                     |                          |                         |
| CSpV1<br>(BAU19320)      | 99,6%               | 98,9%               | 98,9%               | 99,0%               | 99,8%               | 99,4%               | 100%                |                     |                     |                     |                     |                     |                     |                     |                     |                     |                     |                     |                     |                          |                         |
| CSpV1<br>(BAU19316)      | 99,6%               | 98,8%               | 99,0%               | 99,0%               | 99,8%               | 99,4%               | 100,0%              | 100%                |                     |                     |                     |                     |                     |                     |                     |                     |                     |                     |                     |                          |                         |
| CSpV1<br>(BAU19333)      | 99,8%               | 99,0%               | 98,8%               | 98,8%               | 100,0%              | 99,2%               | 99,8%               | 99,8%               | 100%                |                     |                     |                     |                     |                     |                     |                     |                     |                     |                     |                          |                         |
| CSpV1<br>(BAU19330)      | 99,0%               | 98,2%               | 98,1%               | 98,1%               | 99,2%               | 98,8%               | 99,0%               | 99,0%               | 99,2%               | 100%                |                     |                     |                     |                     |                     |                     |                     |                     |                     |                          |                         |
| CSpV1<br>(BAU19332)      | 99,4%               | 98,9%               | 98,3%               | 98,5%               | 99,6%               | 99,4%               | 99,4%               | 99,4%               | 99,6%               | 99,2%               | 100%                |                     |                     |                     |                     |                     |                     |                     |                     |                          |                         |
| CSpV1<br>(BAU19314)      | 99,6%               | 98,9%               | 98,5%               | 98,7%               | 99,8%               | 99,0%               | 99,6%               | 99,6%               | 99,8%               | 99,0%               | 99,4%               | 100%                |                     |                     |                     |                     |                     |                     |                     |                          |                         |
| CSpV1<br>(QBA97381)      | 99,0%               | 98,7%               | 97,9%               | 98,1%               | 99,2%               | 98,5%               | 99,0%               | 99,0%               | 99,2%               | 98,4%               | 98,9%               | 99,0%               | 100%                |                     |                     |                     |                     |                     |                     |                          |                         |
| CSpV1<br>(BAU19331)      | 99,4%               | 98,8%               | 98,4%               | 98,4%               | 99,6%               | 99,4%               | 99,4%               | 99,4%               | 99,6%               | 99,2%               | 100,0%              | 99,4%               | 98,8%               | 100%                |                     |                     |                     |                     |                     |                          |                         |
| CSpV1<br>(BAU19319)      | 99,4%               | 98,8%               | 98,2%               | 98,4%               | 99,6%               | 99,4%               | 99,4%               | 99,4%               | 99,6%               | 99,2%               | 100,0%              | 99,4%               | 98,8%               | 100,0%              | 100%                |                     |                     |                     |                     |                          |                         |
| CSpV1<br>(BAU19335)      | 99,0%               | 98,5%               | 97,9%               | 98,1%               | 99,2%               | 99,0%               | 99,0%               | 99,0%               | 99,2%               | 98,8%               | 99,6%               | 99,0%               | 98,5%               | 99,6%               | 99,6%               | 100%                |                     |                     |                     |                          |                         |
| CSpV1<br>(BAU19317)      | 99,6%               | 98,8%               | 98,4%               | 98,6%               | 99,8%               | 99,0%               | 99,6%               | 99,6%               | 99,8%               | 99,0%               | 99,4%               | 99,6%               | 99,0%               | 99,4%               | 99,4%               | 99,0%               | 100%                |                     |                     |                          |                         |
| CSpV1<br>(ABV83023)      | 99,0%               | 98,3%               | 98,3%               | 98,5%               | 99,2%               | 98,9%               | 99,4%               | 99,4%               | 99,2%               | 98,4%               | 98,9%               | 99,0%               | 98,5%               | 98,8%               | 98,8%               | 98,5%               | 99,0%               | 100%                |                     |                          |                         |
| CSpV1<br>(AAC47806)      | 98,3%               | 97,5%               | 97,1%               | 97,3%               | 98,5%               | 97,7%               | 98,3%               | 98,2%               | 98,4%               | 97,7%               | 98,1%               | 98,7%               | 97,7%               | 98,1%               | 98,0%               | 97,7%               | 98,3%               | 97,7%               | 100%                |                          |                         |
| ScCV1-D254<br>(OK412915) | 35,9%               | 35,9%               | 35,7%               | 35,7%               | 35,7%               | 35,7%               | 35,7%               | 36,9%               | 36,2%               | 36,3%               | 35,7%               | 35,7%               | 35,7%               | 36,2%               | 37,0%               | 35,5%               | 36,0%               | 35,1%               | 35,7%               | 100%                     |                         |
| ScCV1-U43<br>(OK412916)  | 35,9%               | 35,9%               | 35,7%               | 35,7%               | 35,7%               | 35,7%               | 35,7%               | 36,9%               | 36,2%               | 36,3%               | 35,7%               | 35,7%               | 35,7%               | 36,2%               | 37,0%               | 35,5%               | 36,0%               | 35,1%               | 35,7%               | 99,4%                    | 100%                    |
