# Supplementary material for: Identification and Molecular Characterization of Novel Mycoviruses in Saccharomyces and Non-Saccharomyces Yeasts of Oenological Interest
Source: MDPI journal article supplement (doi:10.3390/v14010052), 2021-12-29
Supplement: s1 [file s1]

**Supplementary Table S4:** Nucleotide percent identity (below diagonal) and amino acid percent identity (above diagonal) of ScV-M-2 isolates for K-2 killer toxin.

|                                          | ScV-M2-L2226<br>(OK412898) | ScV-M2-EC1118<br>(OK412899) | ScV-M2-2323<br>(OK412900) | ScV-M2- QA23<br>(OK412901) | ScV-M2-U43<br>(OK412902) | ScV-M2-<br>VL1(OK412903) | ScV-M2- X5<br>(OK412904) | ScV-M2- FX10<br>(OK412905) | ScV-M2-VR5<br>(OK412906) | ScV-M2- PDM<br>(OK412907) | ScV-M2- EZ44<br>(OK412908) | K2 type killer virus<br>(X54154) | mRNA for K2 killer<br>toxin<br>(X56604) | <i>S.cerevisiae</i> K-2 gene<br>(X56987) | ScV-M2-4 (MF957266) |
|------------------------------------------|----------------------------|-----------------------------|---------------------------|----------------------------|--------------------------|--------------------------|--------------------------|----------------------------|--------------------------|---------------------------|----------------------------|----------------------------------|-----------------------------------------|------------------------------------------|---------------------|
| ScV-M2-L2226 (OK412898)                  | 100%                       | 98,6%                       | 99,7%                     | 98,6%                      | 99,2%                    | 98,6%                    | 98,6%                    | 98,3%                      | 98,6%                    | 98,6%                     | 98,6%                      | 98,6%                            | 98,9%                                   | 72,6%                                    | 98,3%               |
| ScV-M2-EC1118 (OK412899)                 | 99,1%                      | 100%                        | 98,3%                     | 100,0%                     | 97,7%                    | 99,4%                    | 100,0%                   | 99,2%                      | 100,0%                   | 100,0%                    | 100,0%                     | 99,2%                            | 98,6%                                   | 72,1%                                    | 98,0%               |
| ScV-M2-2323 (OK412900)                   | 99,8%                      | 98,9%                       | 100%                      | 98,3%                      | 98,9%                    | 98,3%                    | 98,3%                    | 98,0%                      | 98,3%                    | 98,3%                     | 98,3%                      | 98,3%                            | 98,6%                                   | 72,4%                                    | 98,0%               |
| ScV-M2- QA23 (OK412901)                  | 99,0%                      | 99,9%                       | 98,8%                     | 100%                       | 97,7%                    | 99,4%                    | 100,0%                   | 99,2%                      | 100,0%                   | 100,0%                    | 100,0%                     | 99,2%                            | 98,6%                                   | 72,1%                                    | 98,0%               |
| ScV-M2-U43 (OK412902)                    | 99,6%                      | 98,7%                       | 99,4%                     | 98,6%                      | 100%                     | 97,7%                    | 97,7%                    | 97,5%                      | 97,7%                    | 97,7%                     | 97,7%                      | 97,7%                            | 98,0%                                   | 71,8%                                    | 97,5%               |
| ScV-M2- VL1(OK412903)                    | 99,2%                      | 99,2%                       | 99,0%                     | 99,1%                      | 98,8%                    | 100%                     | 99,4%                    | 99,2%                      | 99,4%                    | 99,4%                     | 99,4%                      | 99,2%                            | 98,6%                                   | 72,1%                                    | 98,0%               |
| ScV-M2- X5 (OK412904)                    | 99,0%                      | 99,9%                       | 98,8%                     | 99,8%                      | 98,6%                    | 99,1%                    | 100%                     | 99,2%                      | 100,0%                   | 100,0%                    | 100,0%                     | 99,2%                            | 98,6%                                   | 72,1%                                    | 98,0%               |
| ScV-M2- FX10 (OK412905)                  | 99,3%                      | 99,3%                       | 99,1%                     | 99,2%                      | 98,9%                    | 99,3%                    | 99,2%                    | 100%                       | 99,2%                    | 99,2%                     | 99,2%                      | 98,9%                            | 98,3%                                   | 71,8%                                    | 97,7%               |
| ScV-M2-VR5 (OK412906)                    | 99,1%                      | 100,0%                      | 98,9%                     | 99,9%                      | 98,7%                    | 99,2%                    | 99,9%                    | 99,3%                      | 100%                     | 100,0%                    | 100,0%                     | 99,2%                            | 98,6%                                   | 72,1%                                    | 98,0%               |
| ScV-M2- PDM (OK412907)                   | 99,1%                      | 100,0%                      | 98,9%                     | 99,9%                      | 98,7%                    | 99,2%                    | 99,9%                    | 99,3%                      | 100,0%                   | 100%                      | 100,0%                     | 99,2%                            | 98,6%                                   | 72,1%                                    | 98,0%               |
| ScV-M2- EZ44 (OK412908)                  | 99,1%                      | 100,0%                      | 98,9%                     | 99,9%                      | 98,7%                    | 99,2%                    | 99,9%                    | 99,3%                      | 100,0%                   | 100,0%                    | 100%                       | 99,2%                            | 98,6%                                   | 72,1%                                    | 98,0%               |
| K2 type killer virus<br>(X54154)         | 99,3%                      | 99,3%                       | 99,1%                     | 99,2%                      | 98,9%                    | 99,3%                    | 99,2%                    | 99,4%                      | 99,3%                    | 99,3%                     | 99,3%                      | 100%                             | 98,3%                                   | 72,4%                                    | 97,7%               |
| mRNA for K2 killer toxin<br>(X56604)     | 99,4%                      | 99,1%                       | 99,3%                     | 99,0%                      | 99,1%                    | 99,2%                    | 99,0%                    | 99,3%                      | 99,1%                    | 99,1%                     | 99,1%                      | 99,4%                            | 100%                                    | 72,6%                                    | 98,3%               |
| <i>S.cerevisiae</i> K-2 gene<br>(X56987) | 99,2%                      | 98,9%                       | 99,1%                     | 98,8%                      | 98,9%                    | 99,0%                    | 98,8%                    | 99,1%                      | 98,9%                    | 98,9%                     | 98,9%                      | 99,2%                            | 99,2%                                   | 100%                                     | 72,4%               |
| ScV-M2-4 (MF957266)                      | 98,7%                      | 98,3%                       | 98,5%                     | 98,2%                      | 98,3%                    | 98,4%                    | 98,2%                    | 98,5%                      | 98,3%                    | 98,3%                     | 98,3%                      | 98,5%                            | 98,7%                                   | 98,5%                                    | 100%                |
