# Supplementary material for: Identification and Molecular Characterization of Novel Mycoviruses in Saccharomyces and Non-Saccharomyces Yeasts of Oenological Interest
Source: MDPI journal article supplement (doi:10.3390/v14010052), 2021-12-29
Supplement: s1 [file s1]

**Supplementary table S6:** Amino acid percent identities of SbTV1 for Coat Protein gene.

|                             | DCADSRV-7<br>(YP_009553337) | SbTV1<br>(OK412911) | RaTV<br>(BBZ90081) | MoV2<br>(BCL64969) | MpV3<br>(QKO02073) |
|-----------------------------|-----------------------------|---------------------|--------------------|--------------------|--------------------|
| DCADSRV-7<br>(YP_009553337) | 100%                        |                     |                    |                    |                    |
| SbTV1<br>(OK412911)         | 30,2%                       | 100%                |                    |                    |                    |
| RaTV<br>(BBZ90081)          | 31,0%                       | 29,6%               | 100%               |                    |                    |
| MoV2<br>(BCL64969)          | 35,4%                       | 40,3%               | 41,2%              | 100%               |                    |
| MpV3<br>(QKO02073)          | 32,0%                       | 37,0%               | 38,2%              | 67,3%              | 100%               |
