# Supplementary material for: Identification and Molecular Characterization of Novel Mycoviruses in Saccharomyces and Non-Saccharomyces Yeasts of Oenological Interest
Source: MDPI journal article supplement (doi:10.3390/v14010052), 2021-12-29
Supplement: s1 [file s1]

**Supplementary Table S9:** Amino acid percent identities of ScCV1 isolates for Coat protein.

|                                     | CSpV1<br>(AAC47806.1) | CSpV1<br>(BAU19345) | CSpV1<br>(BAU19344) | CSpV1<br>(BAU19352) | CSpV1<br>(BAU19360) | CSpV1<br>(BAU19353) | CSpV1<br>(BAU19354) | CSpV1<br>(ABV83024) | CSpV1<br>(BAU19355) | CSpV1<br>QBA97382.1 | CSpV1<br>(BAU19364) | CSpV1<br>(BAU19365) | <i>C. hominis</i><br>(ABB02500.1) | <i>C. meleagridis</i><br>(ABB02501) | <i>C. felis</i><br>(ABB02502) | ScCV1-D254<br>(OK412913) | ScCV1-U43<br>(OK412914) |
|-------------------------------------|-----------------------|---------------------|---------------------|---------------------|---------------------|---------------------|---------------------|---------------------|---------------------|---------------------|---------------------|---------------------|-----------------------------------|-------------------------------------|-------------------------------|--------------------------|-------------------------|
| CSpV1<br>(AAC47806.1)               | 100%                  |                     |                     |                     |                     |                     |                     |                     |                     |                     |                     |                     |                                   |                                     |                               |                          |                         |
| CSpV1<br>(BAU19345)                 | 99,7%                 | 100%                |                     |                     |                     |                     |                     |                     |                     |                     |                     |                     |                                   |                                     |                               |                          |                         |
| CSpV1<br>(BAU19344)                 | 99,7%                 | 100,0%              | 100%                |                     |                     |                     |                     |                     |                     |                     |                     |                     |                                   |                                     |                               |                          |                         |
| CSpV1<br>(BAU19352)                 | 99,4%                 | 99,7%               | 99,7%               | 100%                |                     |                     |                     |                     |                     |                     |                     |                     |                                   |                                     |                               |                          |                         |
| CSpV1<br>(BAU19360)                 | 99,7%                 | 100,0%              | 100,0%              | 99,7%               | 100%                |                     |                     |                     |                     |                     |                     |                     |                                   |                                     |                               |                          |                         |
| CSpV1<br>(BAU19353)                 | 99,4%                 | 100,0%              | 100,0%              | 99,4%               | 100,0%              | 100%                |                     |                     |                     |                     |                     |                     |                                   |                                     |                               |                          |                         |
| CSpV1<br>(BAU19354)                 | 99,7%                 | 100,0%              | 100,0%              | 99,7%               | 100,0%              | 100,0%              | 100%                |                     |                     |                     |                     |                     |                                   |                                     |                               |                          |                         |
| CSpV1<br>(ABV83024)                 | 98,7%                 | 99,3%               | 99,3%               | 98,7%               | 99,3%               | 98,7%               | 99,3%               | 100%                |                     |                     |                     |                     |                                   |                                     |                               |                          |                         |
| CSpV1<br>(BAU19355)                 | 99,1%                 | 100,0%              | 100,0%              | 99,1%               | 99,7%               | 99,1%               | 99,7%               | 98,7%               | 100%                |                     |                     |                     |                                   |                                     |                               |                          |                         |
| CSpV1<br>QBA97382.1                 | 99,7%                 | 100,0%              | 100,0%              | 99,7%               | 100,0%              | 99,7%               | 100,0%              | 99,1%               | 99,4%               | 100%                |                     |                     |                                   |                                     |                               |                          |                         |
| CSpV1<br>(BAU19364)                 | 99,0%                 | 99,3%               | 99,7%               | 99,0%               | 99,3%               | 99,3%               | 99,3%               | 98,7%               | 99,3%               | 99,3%               | 100%                |                     |                                   |                                     |                               |                          |                         |
| CSpV1<br>(BAU19365)                 | 99,3%                 | 99,7%               | 99,7%               | 99,3%               | 99,7%               | 99,7%               | 99,7%               | 99,0%               | 99,7%               | 99,7%               | 100,0%              | 100%                |                                   |                                     |                               |                          |                         |
| <i>C. hominis</i><br>(ABB02500.1)   | 93,1%                 | 93,4%               | 93,3%               | 92,8%               | 93,4%               | 92,8%               | 93,4%               | 92,2%               | 92,5%               | 93,1%               | 92,7%               | 93,0%               | 100%                              |                                     |                               |                          |                         |
| <i>C. meleagridis</i><br>(ABB02501) | 86,2%                 | 88,0%               | 88,0%               | 86,2%               | 88,1%               | 86,5%               | 88,2%               | 86,2%               | 86,2%               | 86,5%               | 87,7%               | 88,0%               | 85,9%                             | 100%                                |                               |                          |                         |
| <i>C. felis</i><br>(ABB02502)       | 88,7%                 | 90,0%               | 90,0%               | 88,7%               | 90,1%               | 89,0%               | 90,2%               | 88,1%               | 88,4%               | 89,0%               | 89,7%               | 90,0%               | 87,5%                             | 91,2%                               | 100%                          |                          |                         |
| ScCV1-D254<br>(OK412913)            | 20,5%                 | 21,2%               | 21,2%               | 20,2%               | 21,1%               | 20,5%               | 20,9%               | 20,2%               | 20,8%               | 20,5%               | 21,2%               | 21,3%               | 21,2%                             | 21,8%                               | 21,2%                         | 100%                     |                         |
| ScCV1-U43<br>(OK412914)             | 20,5%                 | 21,2%               | 21,2%               | 20,2%               | 21,1%               | 20,5%               | 20,9%               | 20,2%               | 20,8%               | 20,5%               | 21,2%               | 21,3%               | 21,2%                             | 21,8%                               | 21,2%                         | 98,7%                    | 100%                    |
