# Supplementary material for: Identification and Molecular Characterization of Novel Mycoviruses in Saccharomyces and Non-Saccharomyces Yeasts of Oenological Interest
Source: MDPI journal article supplement (doi:10.3390/v14010052), 2021-12-29
Supplement: s1 [file s1]

**Supplementary Table S10:** Amino acid identities of ScV-NV-NDA21 for RNA dependent RNA polymerase.

|                            | ScNV-23S<br>(NP_660177) | ScNV-I329<br>(QFU28543) | ScV-NV-NDA21<br>(OK412912) | ScNV-20S<br>(AAA47824) | ScNV-20S<br>(NP_660178) |
|----------------------------|-------------------------|-------------------------|----------------------------|------------------------|-------------------------|
| ScNV-23S<br>(NP_660177)    | 100%                    |                         |                            |                        |                         |
| ScNV-I329<br>(QFU28543)    | 29,5%                   | 100%                    |                            |                        |                         |
| ScV-NV-NDA21<br>(OK412912) | 30,0%                   | 55,9%                   | 100%                       |                        |                         |
| ScNV-20S<br>(AAA47824)     | 30,2%                   | 55,8%                   | 98,6%                      | 100%                   |                         |
| ScNV-20S<br>(NP_660178)    | 30,2%                   | 56,2%                   | 98,7%                      | 99,9%                  | 100%                    |
