# Supplementary material for: Identification and Molecular Characterization of Novel Mycoviruses in Saccharomyces and Non-Saccharomyces Yeasts of Oenological Interest
Source: MDPI journal article supplement (doi:10.3390/v14010052), 2021-12-29

**Supplementary Figure S3:** Phylogenetic analysis of ScV-L-BC viral isolates. Maximum-likelihood tree was constructed based on the alignment of a 801 bp-long fragment covering partial RdRp and CP genes. Bootstrap values reported at the nodes are from 1000 replicates. Sequences determined in this work are indicated by ♦.

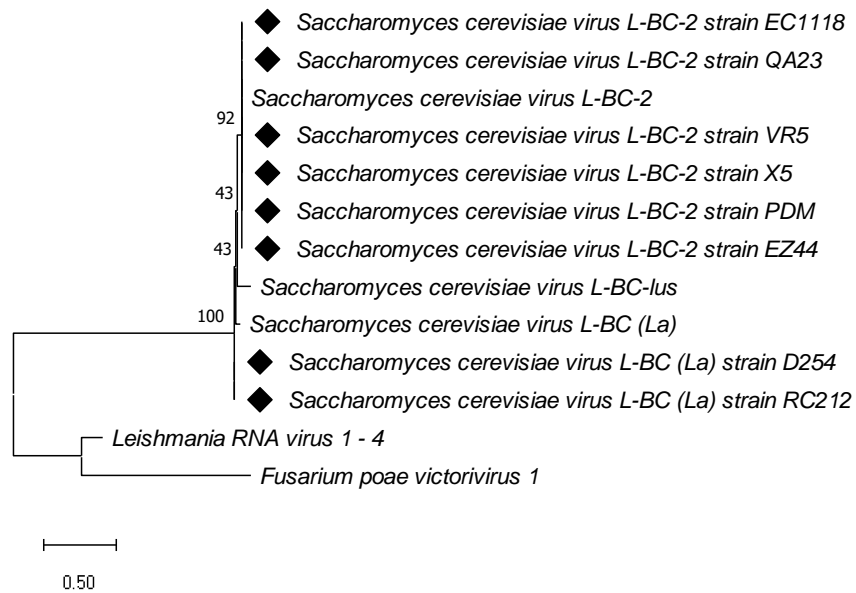

Supplement: s1 [file s1]
