# Supplementary material for: Identification and Molecular Characterization of Novel Mycoviruses in Saccharomyces and Non-Saccharomyces Yeasts of Oenological Interest
Source: MDPI journal article supplement (doi:10.3390/v14010052), 2021-12-29
Supplement: s1 [file s1]

**Supplementary Table S3:** Nucleotide percent identity (below diagonal) and amino acid percent identity (above diagonal) of ScV-LA isolates for Coat protein gene.

|                               | ScV-LA-lus-D254<br>(OK377006) | ScV-LA2-L2226<br>(OK377007) | ScV-LA2-EC1118<br>(OK377008) | ScV-LA2-2323<br>(OK377009) | ScV-LA2-QA23<br>(OK377010) | ScV-LA-lus-U43<br>(OK377011) | ScV-LA2-VL1<br>(OK377012) | ScV-LA2-X5<br>(OK377013) | ScV-LA2-FX10<br>(OK377014) | ScV-LA2-VR5<br>(OK377015) | ScV-LA2-PDM<br>(OK377016) | ScV-LA2-EZ44<br>(OK377017) | ScV-LA2_8F-13<br>(KC677754) | ScV-LA-lus<br>(JN819511) | ScV-LA1-1<br>(KX601068) | ScV-LA28<br>(KU845301) |
|-------------------------------|-------------------------------|-----------------------------|------------------------------|----------------------------|----------------------------|------------------------------|---------------------------|--------------------------|----------------------------|---------------------------|---------------------------|----------------------------|-----------------------------|--------------------------|-------------------------|------------------------|
| ScV-LA-lus-D254<br>(OK377006) | 100%                          | 96,3%                       | 95,8%                        | 96,3%                      | 95,8%                      | 97,2%                        | 96,3%                     | 95,8%                    | 96,3%                      | 95,8%                     | 95,8%                     | 95,8%                      | 96,3%                       | 99,5%                    | 93,0%                   | 90,2%                  |
| ScV-LA2-L2226<br>(OK377007)   | 79,3%                         | 100%                        | 99,5%                        | 100,0%                     | 99,5%                      | 95,8%                        | 100,0%                    | 99,5%                    | 100,0%                     | 99,5%                     | 99,5%                     | 99,5%                      | 100,0%                      | 95,8%                    | 93,5%                   | 92,1%                  |
| ScV-LA2-EC1118<br>(OK377008)  | 79,3%                         | 99,7%                       | 100%                         | 99,5%                      | 100,0%                     | 95,3%                        | 99,5%                     | 100,0%                   | 99,5%                      | 100,0%                    | 100,0%                    | 100,0%                     | 99,5%                       | 95,3%                    | 93,0%                   | 91,6%                  |
| ScV-LA2-2323<br>(OK377009)    | 79,3%                         | 100,0%                      | 99,7%                        | 100%                       | 99,5%                      | 95,8%                        | 100,0%                    | 99,5%                    | 100,0%                     | 99,5%                     | 99,5%                     | 99,5%                      | 100,0%                      | 95,8%                    | 93,5%                   | 92,1%                  |
| ScV-LA2-QA23<br>(OK377010)    | 79,1%                         | 99,5%                       | 99,8%                        | 99,5%                      | 100%                       | 95,3%                        | 99,5%                     | 100,0%                   | 99,5%                      | 100,0%                    | 100,0%                    | 100,0%                     | 99,5%                       | 95,3%                    | 93,0%                   | 91,6%                  |
| ScV-LA-lus-U43<br>(OK377011)  | 85,3%                         | 77,6%                       | 77,6%                        | 77,6%                      | 77,7%                      | 100%                         | 95,8%                     | 95,3%                    | 95,8%                      | 95,3%                     | 95,3%                     | 95,3%                      | 95,8%                       | 96,7%                    | 93,0%                   | 90,7%                  |
| ScV-LA2-VL1<br>(OK377012)     | 79,1%                         | 99,5%                       | 99,2%                        | 99,5%                      | 99,1%                      | 77,7%                        | 100%                      | 99,5%                    | 100,0%                     | 99,5%                     | 99,5%                     | 99,5%                      | 100,0%                      | 95,8%                    | 93,5%                   | 92,1%                  |
| ScV-LA2-X5<br>(OK377013)      | 79,3%                         | 99,7%                       | 100,0%                       | 99,7%                      | 99,8%                      | 77,6%                        | 99,2%                     | 100%                     | 99,5%                      | 100,0%                    | 100,0%                    | 100,0%                     | 99,5%                       | 95,3%                    | 93,0%                   | 91,6%                  |
| ScV-LA2-FX10<br>(OK377014)    | 79,4%                         | 99,8%                       | 99,5%                        | 99,8%                      | 99,4%                      | 77,7%                        | 99,4%                     | 99,5%                    | 100%                       | 99,5%                     | 99,5%                     | 99,5%                      | 100,0%                      | 95,8%                    | 93,5%                   | 92,1%                  |
| ScV-LA2-VR5<br>(OK377015)     | 79,3%                         | 99,7%                       | 100,0%                       | 99,7%                      | 99,8%                      | 77,6%                        | 99,2%                     | 100,0%                   | 99,5%                      | 100%                      | 100,0%                    | 100,0%                     | 99,5%                       | 95,3%                    | 93,0%                   | 91,6%                  |
| ScV-LA2-PDM<br>(OK377016)     | 79,3%                         | 99,7%                       | 100,0%                       | 99,7%                      | 99,8%                      | 77,6%                        | 99,2%                     | 100,0%                   | 99,5%                      | 100%                      | 100%                      | 100%                       | 99,5%                       | 95,3%                    | 93,0%                   | 91,6%                  |
| ScV-LA2-EZ44<br>(OK377017)    | 79,3%                         | 99,7%                       | 100,0%                       | 99,7%                      | 99,8%                      | 77,6%                        | 99,2%                     | 100,0%                   | 99,5%                      | 100%                      | 100%                      | 100%                       | 99,5%                       | 95,3%                    | 93,0%                   | 91,6%                  |
| ScV-LA2_8F-13<br>(KC677754)   | 79,4%                         | 99,5%                       | 99,2%                        | 99,5%                      | 99,1%                      | 77,4%                        | 99,1%                     | 99,2%                    | 99,4%                      | 99,2%                     | 99,2%                     | 99,2%                      | 100%                        | 95,8%                    | 93,5%                   | 92,1%                  |
| ScV-LA-lus (JN819511)         | 98,6%                         | 79,0%                       | 79,0%                        | 79,0%                      | 78,8%                      | 84,9%                        | 78,8%                     | 79,0%                    | 79,1%                      | 79,0%                     | 79,0%                     | 79,0%                      | 79,1%                       | 100%                     | 92,6%                   | 89,8%                  |
| ScV-LA1-1 (KX601068)          | 76,7%                         | 76,8%                       | 76,8%                        | 76,8%                      | 77,0%                      | 76,8%                        | 77,0%                     | 76,8%                    | 76,7%                      | 76,8%                     | 76,8%                     | 76,8%                      | 76,7%                       | 76,5%                    | 100%                    | 94,4%                  |
| ScV-LA28 (KU845301)           | 79,0%                         | 78,2%                       | 77,9%                        | 78,2%                      | 77,7%                      | 79,4%                        | 77,9%                     | 77,9%                    | 78,2%                      | 77,9%                     | 77,9%                     | 77,9%                      | 77,7%                       | 78,7%                    | 79,0%                   | 100%                   |
